# Supplementary material for: Comparing Continuous with Periodic Vital Sign Scoring for Clinical Deterioration Using a Patient Data Model
Source: Springer Nature journal article supplement (doi:10.1007/s10916-023-01954-z), 2023-05-08
Supplement: MOESM1 [file 25331742]

Appendix 1. Modified Early Warning Score algorithm and follow-up protocol.

|   | Score points                  | 3      | 2      | 1         | 0         | 1         | 2         | 3     |
|---|-------------------------------|--------|--------|-----------|-----------|-----------|-----------|-------|
| A | Oxygen delivery, L/min        |        |        |           | None      | < 5       | ≥ 5       |       |
|   | Oxygen saturation, %          | ≤ 91   | 92-93  | 94-95     | ≥ 96      |           |           |       |
| B | Respiratory rate, /min        | ≤ 8    |        | 9-11      | 12-20     |           | 21-24     | ≥ 25  |
| C | Heart rate, /min              | ≤ 40   |        | 41-50     | 51-90     | 91-110    | 111-130   | ≥ 131 |
|   | Systolic blood pressure, mmHg | ≤ 90   | 91-100 | 101-110   | 111-219   |           |           | ≥ 220 |
| D | Consciousness                 |        |        |           | A         |           | Delirious | V/P/U |
| E | Core temperature, Celsius     | ≤ 35.0 |        | 35.1-36.0 | 36.1-38.0 | 38.1-39.0 | ≥ 39.1    |       |

| MEWS | Protocol action                                                                                                                                             |
|------|-------------------------------------------------------------------------------------------------------------------------------------------------------------|
| 0-2  | Next measurement <8 hours                                                                                                                                   |
| 3-5  | Next measurement <4 hours, consultation fellow nurse or ward physician                                                                                      |
| ≥6   | Measurements every hour, consider continuous vital sign monitoring. Consultation ward physician within 10 min and/or Rapid Response Team (RRT) consultation |
|      | Be also aware of sepsis.                                                                                                                                    |

AVPU-score: A; Alert (patient is awake and follows commands), V; Voice (patient does not respond to verbal stimulus), P; Pain (patient responds only to a painful stimulus), U; Unresponsive
